# Supplementary material for: A common tattoo chemical for energy storage: henna plant-derived naphthoquinone dimer as a green and sustainable cathode material for Li-ion batteries
Source: Royal Society of Chemistry journal article supplement (doi:10.1039/c7ra12357d), 2018-01-01
Supplement: c7ra12357d1.pdf [file c7ra12357d1.pdf]

## Electronic Supplementary Information (ESI)

### A Common Tattoo Chemical for Energy Storage: Henna Plant-Derived Napthoquinone Dimer as a Green and Sustainable Cathode Material for Li-Ion Batteries

Mikhail Miroshnikov,<sup>[a][b]</sup> Keiko Kato,<sup>[c]</sup> Gangula Babu,<sup>[c]</sup> Kizhuri P. Divya,<sup>[a]</sup> Leela Mohana Reddy Arava,<sup>\*[d]</sup> Pulickel M. Ajayan,<sup>\*[c]</sup> and George John<sup>\*[a][b]</sup>

<sup>[a]</sup>Department of Chemistry and Center for Discovery and Innovation, The City College of New York, 85 St. Nicholas Terrace, New York, NY 10031, USA. <sup>[b]</sup>Ph.D. Program in Chemistry, The Graduate Center of The City University of New York, 365 5<sup>th</sup> Ave, New York, NY, 10016, USA. <sup>[c]</sup>Department of Materials Science and Nano Engineering, Rice University, 6100 Main Street MS 325, Houston, TX 77005, USA. <sup>[d]</sup>Department of Mechanical Engineering, Wayne State University, 5050 Anthony Wayne Dr., Detroit, MI 48202, USA.

**Corresponding Authors:** George John, [gjohn@ccny.cuny.edu](mailto:gjohn@ccny.cuny.edu); P. Ajayan, [ajayan@rice.edu](mailto:ajayan@rice.edu); Leela Mohana Reddy Arava, [leela.arava@wayne.edu](mailto:leela.arava@wayne.edu)

### Material Characterization:

#### *Lawsonone (LS):*

<sup>1</sup>H NMR [300 MHz, DMSO-d<sub>6</sub>, δ]: 11.63 (1H, br s) 8.00 (1H, d), 7.94 (1H, d), 7.82 (2H, m). <sup>13</sup>C NMR (125 MHz, δ): 182.30, 180.19, 156.41, 134.96, 133.56, 132.06, 130.18, 126.13, 125.98, 115.50. FTIR (ATR, cm<sup>-1</sup>): 3300, 1670, 1630, 1583, 1219; MS (ESI+) *m/z*: 197.2 (100%, M + Na) 175 (57.8, M + H).

#### *Bislawsone (BL):*

<sup>1</sup>H NMR [300 MHz, DMSO-d<sub>6</sub>, δ]: 11.37 (2H, br s) 8.10 (2H, d), 8.01 (2H, d), 7.86 (4H, m). <sup>13</sup>C NMR (125 MHz, δ): 182.30, 180.19, 156.41, 134.96, 133.56, 132.06, 130.18, 126.13, 125.98,

115.50. FTIR (ATR,  $\text{cm}^{-1}$ ): 3300, 1670, 1630, 1583, 1219. MS (ESI<sup>-</sup>)  $m/z$ : 345.2 (100%, M – H) 346.2 (70.9, M).

***Lithiated Bislawsone (Li-BL):***

<sup>1</sup>H NMR [300 MHz, DMSO-d<sub>6</sub>,  $\delta$ ]: 7.99 (1H, d), 7.87 (1H, d), 7.72 (1H, t), 7.62 (1H, t). <sup>13</sup>C NMR (125 MHz,  $\delta$ ): 188.94, 181.28, 167.77, 136.18, 134.19, 131.47, 131.11, 125.86, 125.33, 117.10. FTIR (ATR,  $\text{cm}^{-1}$ ): 1660, 1583, 1510, 1219, 663.

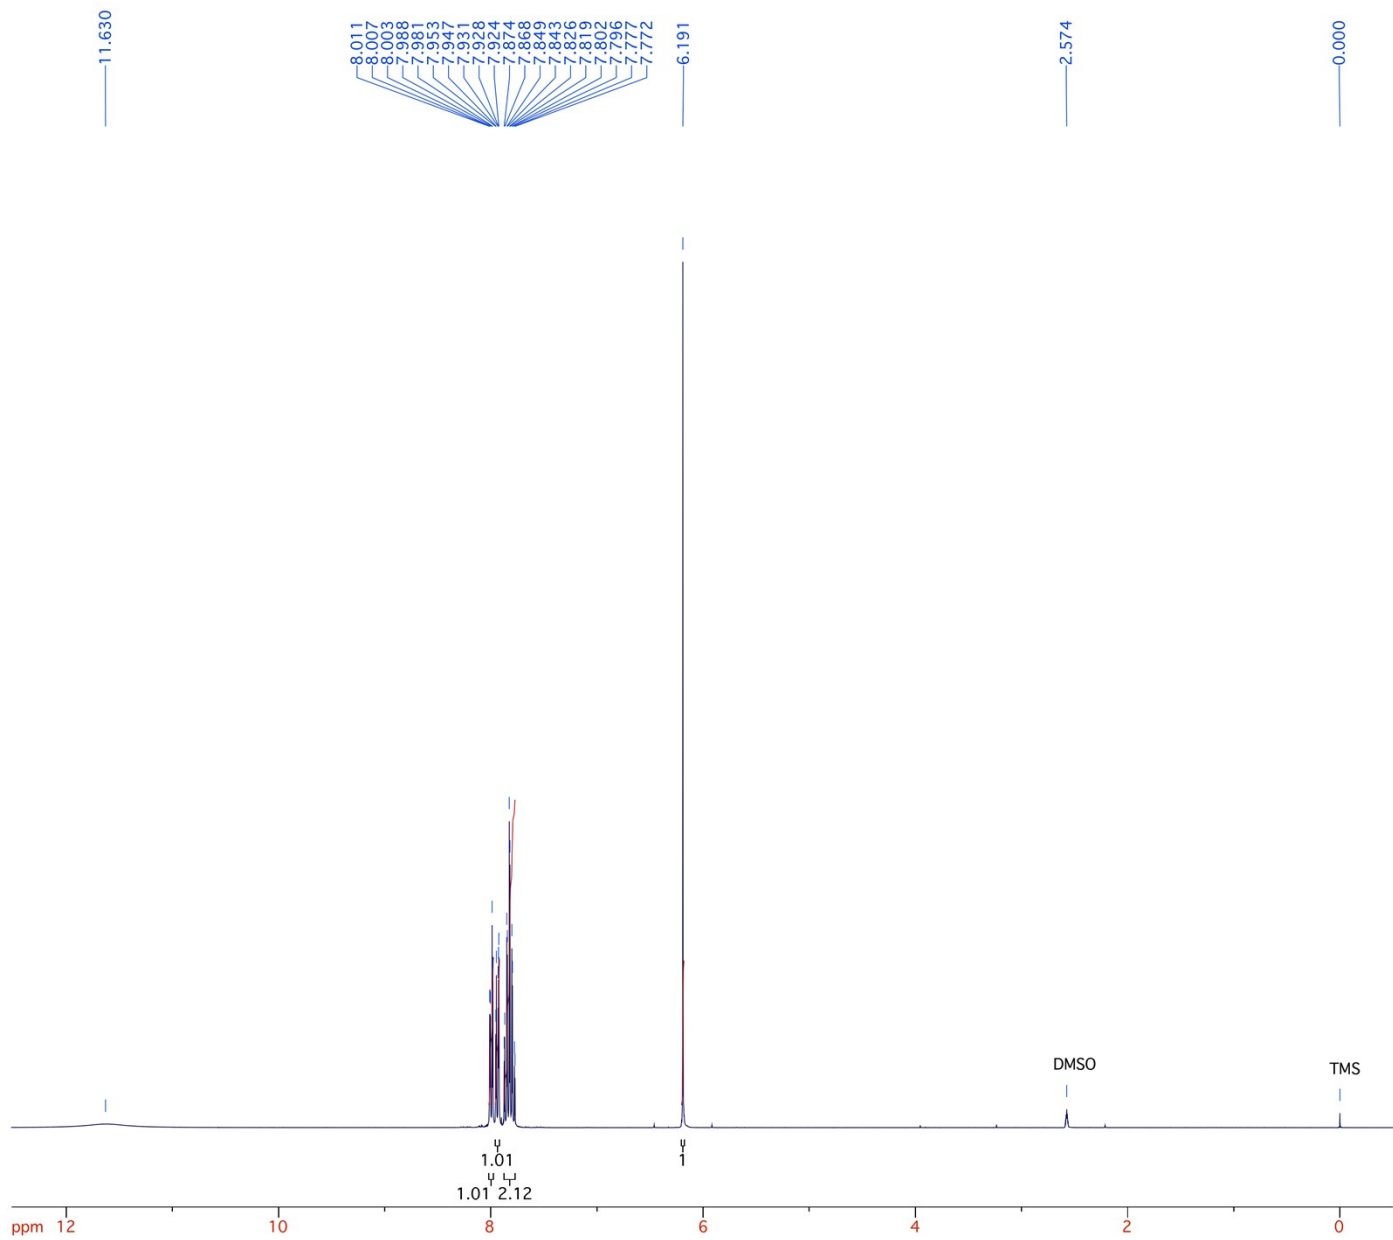

**Figure S1:** Expanded  $^1\text{H}$  NMR spectrum of pure lawsone (LS) in DMSO with TMS at 0.00 ppm as a reference.

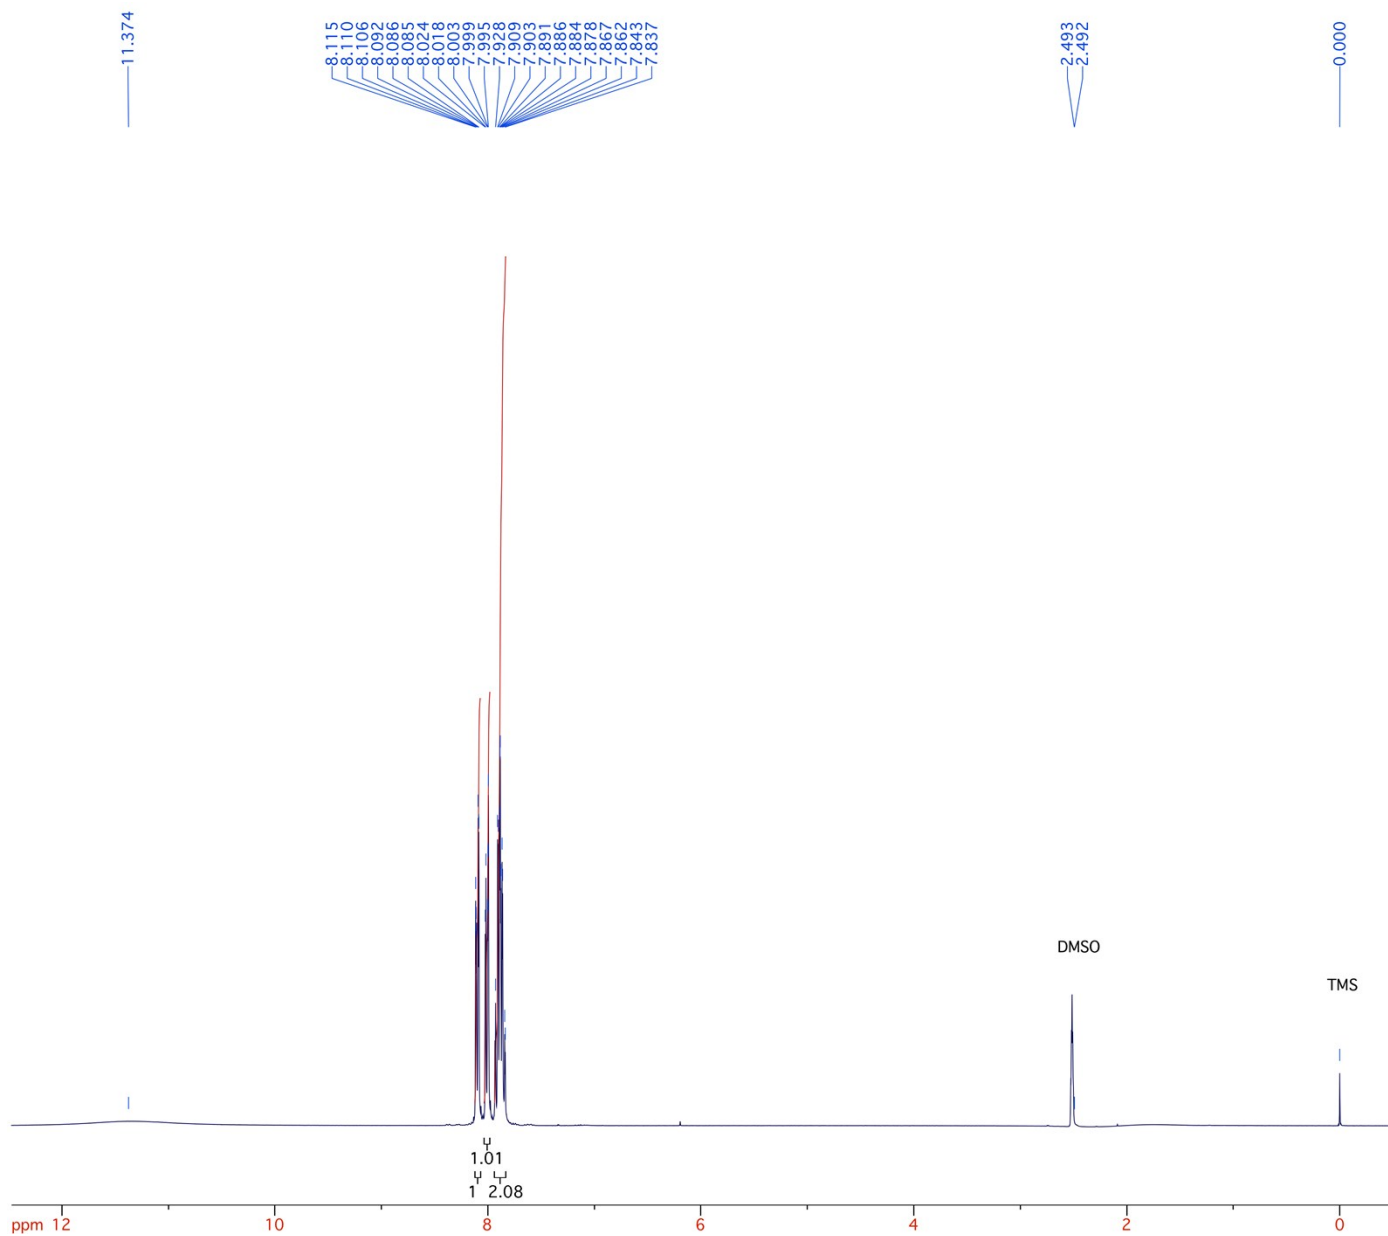

**Figure S2:** Expanded  $^1\text{H}$  NMR spectrum of pure bislawsone (BL) in DMSO with TMS at 0.00 ppm as a reference.

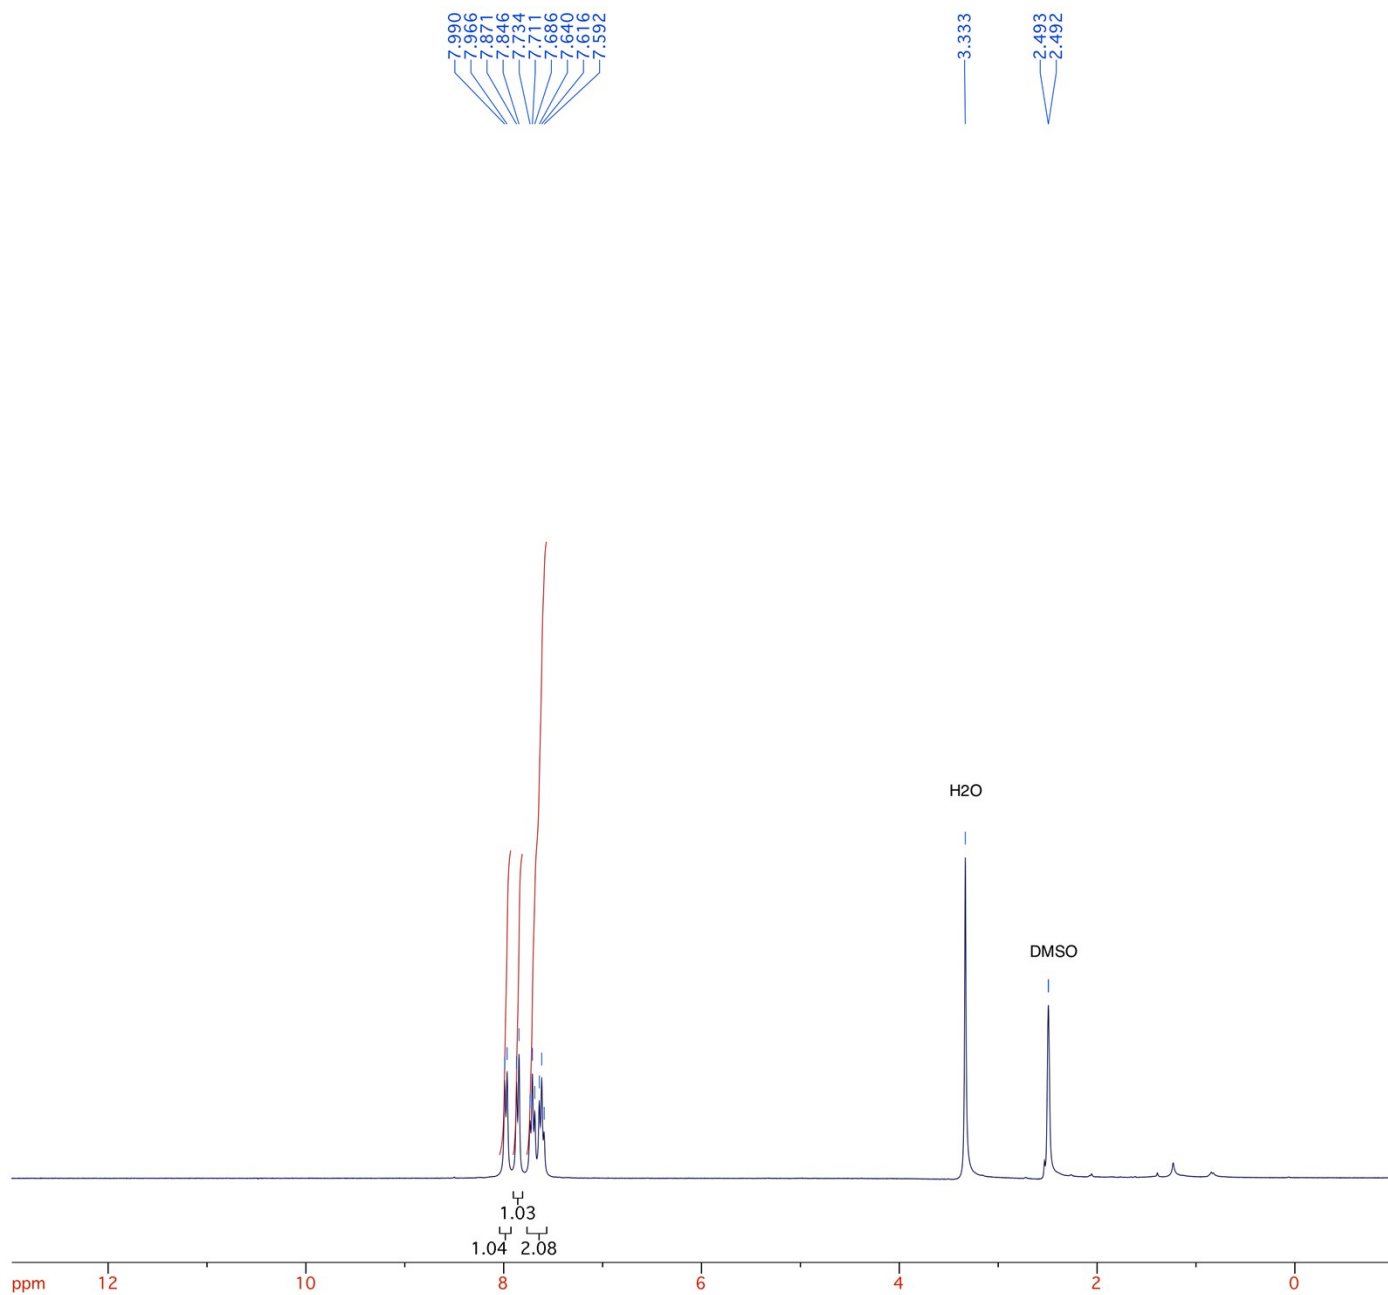

**Figure S3:** Expanded <sup>1</sup>H NMR spectrum of fully lithiated bislawsonone (Li-BL) in DMSO with Li metal as lithium source.

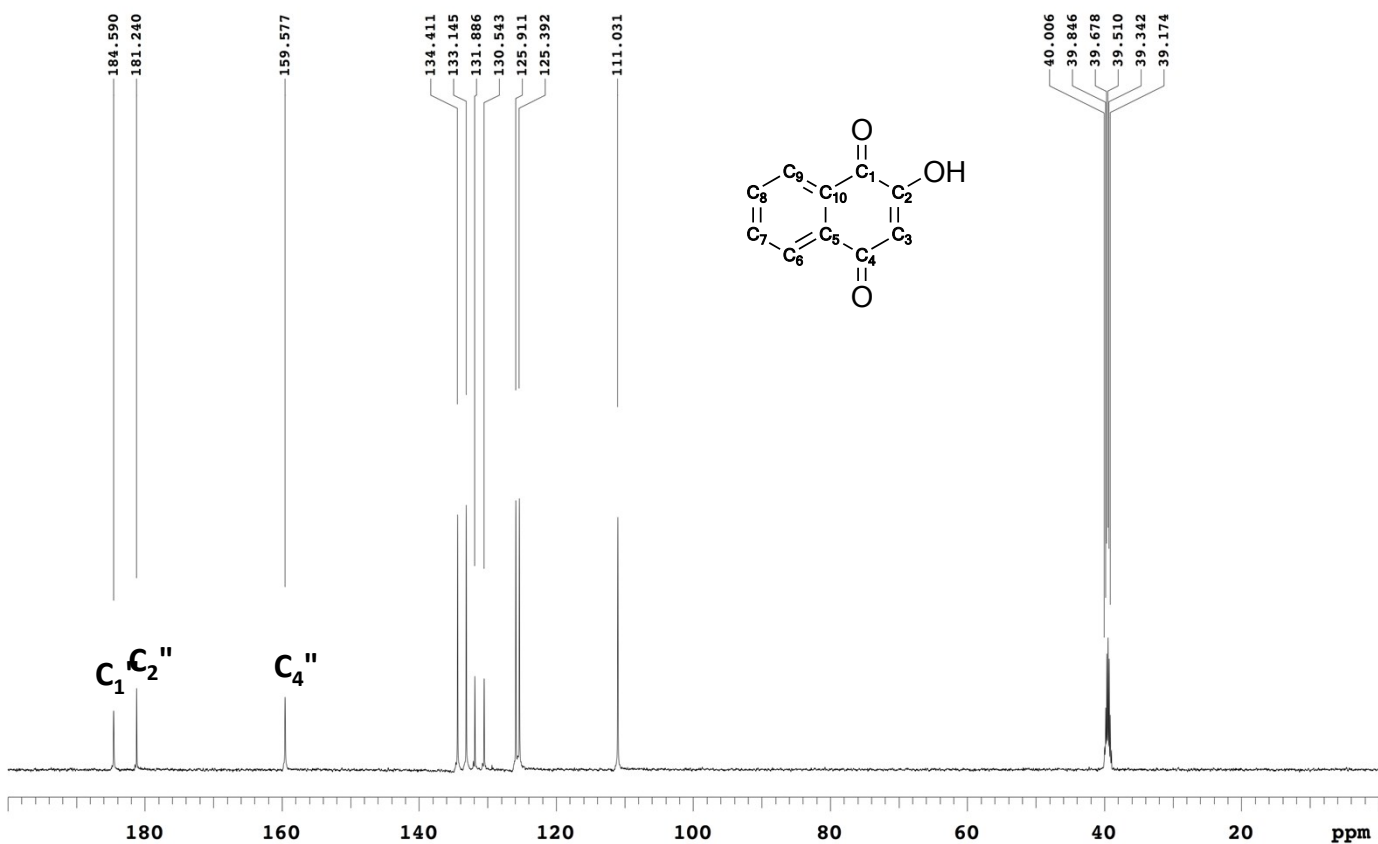

**Figure S4:** Annotated  $^{13}\text{C}$  NMR spectrum of lawsone (LS) in DMSO. Carbons 1 and 4 (carbonyl), as well as carbon 2 (hydroxyl), have been labeled to highlight the significant downfield chemical shift upon subsequent dimerization to bislawsone (BL) and lithium coordination to form lithiated bislawsone (Li – BL).

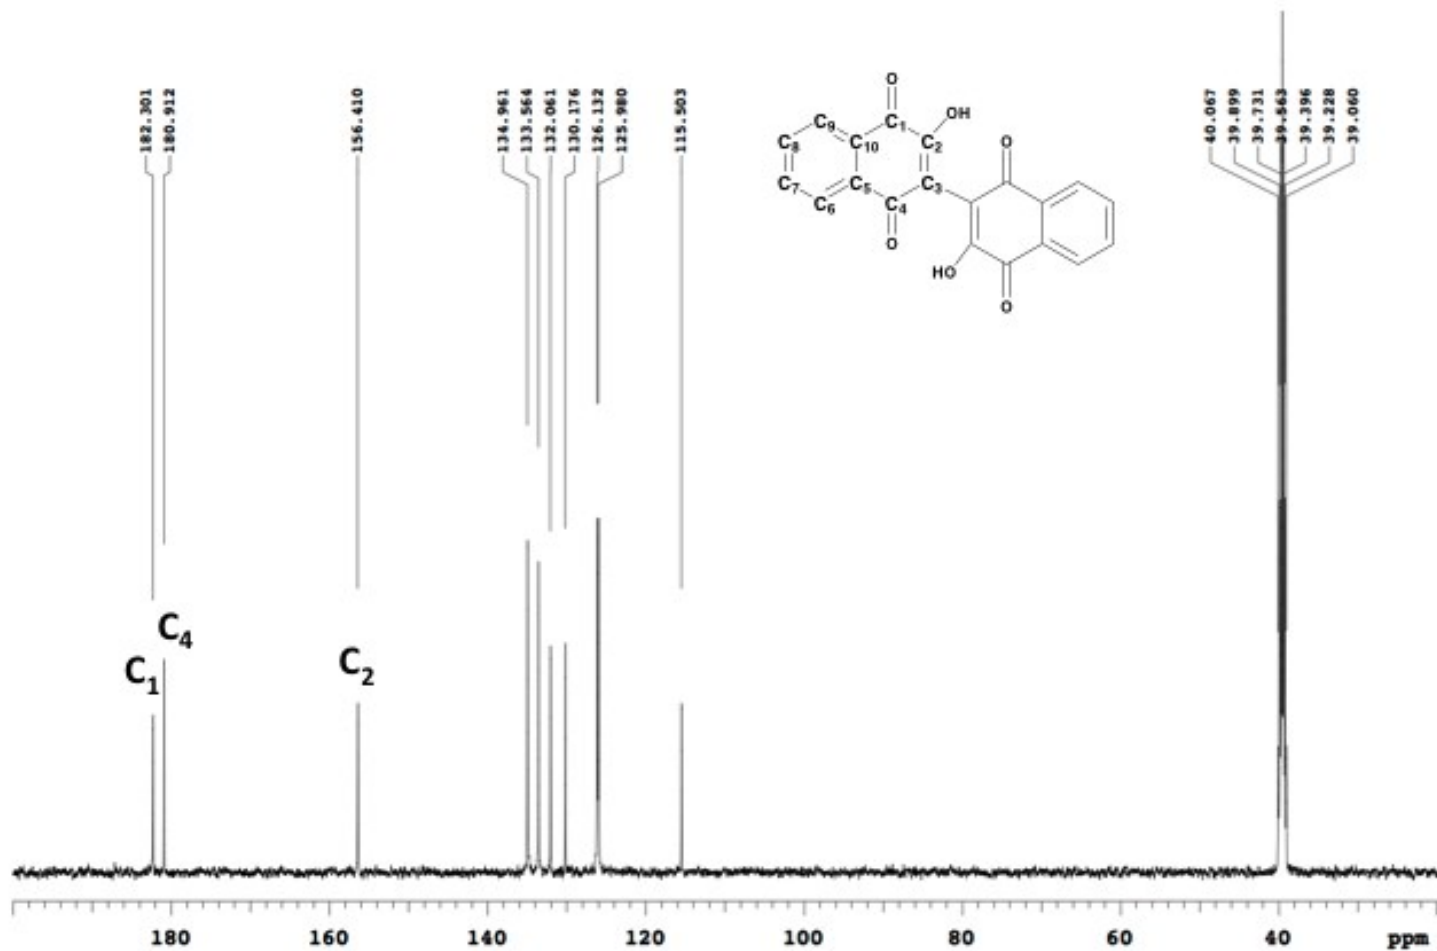

**Figure S5:** Annotated  $^{13}\text{C}$  NMR spectrum of bislawsone (BL) in DMSO. Carbons 1 and 4 (carbonyl), as well as carbon 2 (hydroxyl), have been labeled to highlight the significant downfield chemical shift upon lithium coordination to form lithiated bislawsone (Li – BL).

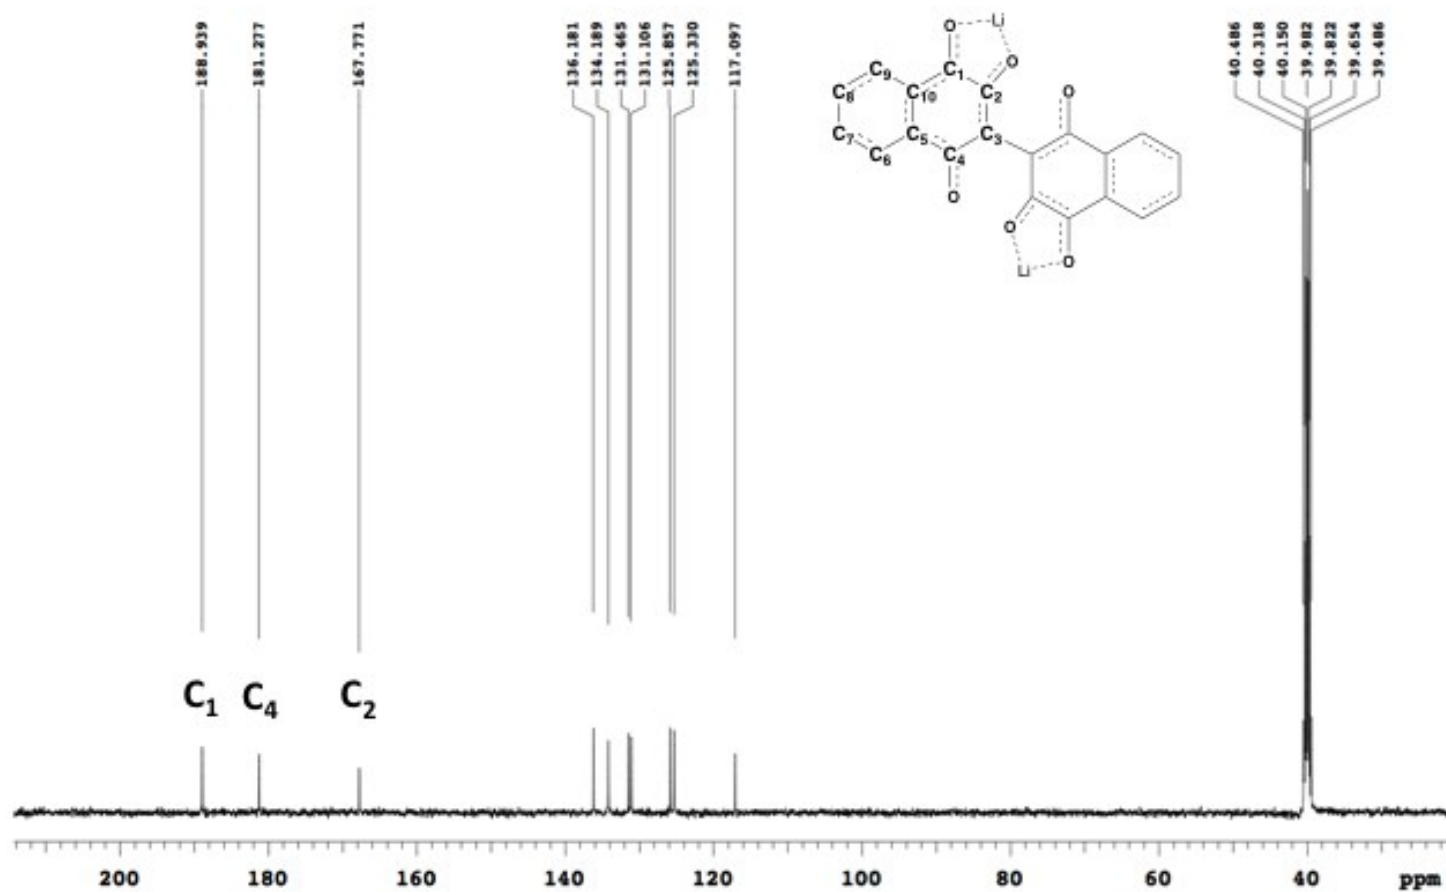

**Figure S6:** Annotated  $^{13}\text{C}$  NMR spectrum of Li-BL in DMSO. Carbons 1 and 4 (carbonyl), as well as carbon 2 (hydroxyl), have been labeled to highlight the chemical shift of peaks upon lithium coordination compared to bislawsone (BL).



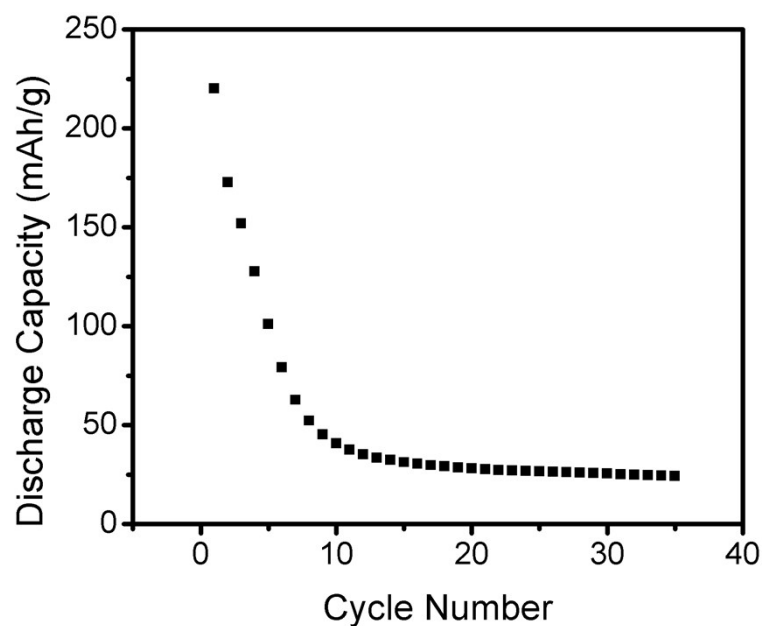

**Fig S7:** Capacity retention of lawsone molecule tested at current density of 50 mA/g.

**Fig S7** represents galvanostatic discharge capacity conducted at current density of 50 mA/g on lawsone molecules. Although greater initial discharge (220 mAh/g) was observed for lawsone molecule than bislawsone (130 mAh/g), more pronounced capacity fade was observed for lawsone molecule than bislawsone molecule.
